# Supplementary material for: SNP Discovery with EST and NextGen Sequencing in Switchgrass (Panicum virgatum L.)
Source: PLoS One. 2012 Sep 25;7(9):e44112. doi: 10.1371/journal.pone.0044112 (PMC3458043; doi:10.1371/journal.pone.0044112)
Supplement: Table S2 — Names of the libraries that were used to tag reads from each library in the data files distributed from the project website at http://www.maizegenetics.net/snp-discovery-in-switchgrass . (XLSX) [file pone.0044112.s002.xlsx]

## Sheet: Table S2
Line Name	Population Type	EST-library	SRS-library
Blackwell	Upland cultivar	-	FYUF
Carthage	Upland cultivar	CCTW	FYUW													m
Cave-In-Rock	Upland cultivar	CCTX	FYUX
Dacotah	Upland cultivar	CFBY	FYWA
Forestburg	Upland cultivar	CFBZ	FYWB
Kanlow	Lowland cultivar	CCTY	-
KY1625	Upland cultivar	-	FYUG
Pathfinder	Upland cultivar	CCTZ	FYUZ
Shelter	Mixed	-	FYUP
Sunburst	Upland cultivar	CFCA	FYUS
WS4U	Upland “4X” germplasm pool	CFCB	FYWC
WS8U	Upland “8X” germplasm pool	NA	FYUT
WS98-IP	NA	NA	FYUU
WS98-SB	NA	NA	FYWF
